# Supplementary material for: Efficient and ecofriendly cellulose-supported MIL-100(Fe) for wastewater treatment
Source: Royal Society of Chemistry journal article supplement (doi:10.1039/d1ra08949h), 2022-01-01
Supplement: d1ra08949h1.pdf [file d1ra08949h1.pdf]

## Efficient and ecofriendly cellulose-supported MIL-100(Fe) for wastewater treatment

Seyed Dariush Taherzade, Mehrnaz Abbasichaleshtori, Janet Soleimannejad\*

*School of Chemistry, College of Science, University of Tehran, P. O. Box 14155-6455, Tehran, Iran.*

\*Correspondence: [janet\\_soleimannejad@khayam.ut.ac.ir](mailto:janet_soleimannejad@khayam.ut.ac.ir)

**Table S1.** Schematic view of MIL-100 (iron polyhedra, oxygen and carbon are represented in orange, red and gray respectively) [1].

|                                                                                                                                            |                                                                                     |
|--------------------------------------------------------------------------------------------------------------------------------------------|-------------------------------------------------------------------------------------|
| <b>Name:</b><br>MIL-100(Fe)                                                                                                                | 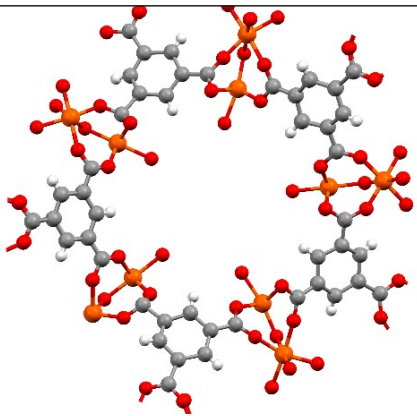 |
| <b>Formula:</b><br>$\text{Fe}_3\text{O}(\text{OH})(\text{H}_2\text{O})_2[\text{C}_6\text{H}_3(\text{CO}_2)_3]_2 \cdot n\text{H}_2\text{O}$ |                                                                                     |
| <b>Mesoporous cages:</b><br>25 & 29 Å                                                                                                      |                                                                                     |
| <b>Microporous windows:</b><br>4.8 x 5.8 and 8.6 Å                                                                                         |                                                                                     |

**Table S2.** Skeletal formula and some of the chemical and pharmacokinetic data of lorazepam [2-4].

|                                                                                |                                                                                      |
|--------------------------------------------------------------------------------|--------------------------------------------------------------------------------------|
| <b>Name:</b><br>L-Lorazepam Acetate<br>(Lorazepam)                             | 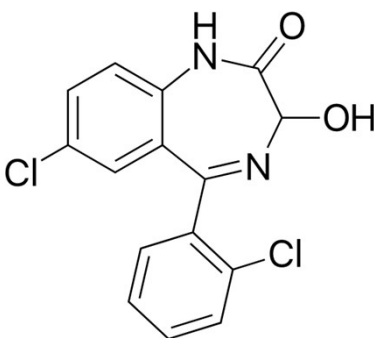 |
| <b>Formula:</b><br>$\text{C}_{15}\text{H}_{10}\text{Cl}_2\text{N}_2\text{O}_2$ |                                                                                      |
| <b>Excretion:</b><br>Kidney                                                    |                                                                                      |
| <b>Solubility in water:</b><br>$80 \text{ mg} \cdot \text{L}^{-1}$             |                                                                                      |

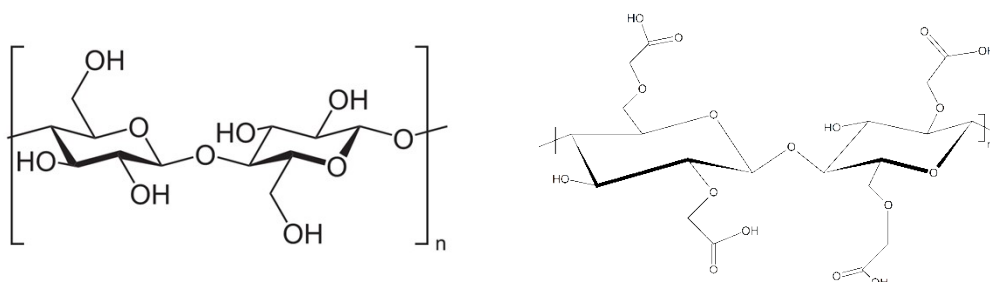

**Fig. S1.** D-glucose units linked by  $\beta(1 \rightarrow 4)$  glycosidic bond (left) [5] and carboxymethylated cellulose (right) [6].

## References

- [1] P. Horcajada, S. Surblé, C. Serre, D.-Y. Hong, Y.-K. Seo, J.-S. Chang, J.-M. Grenèche, I. Margiolaki, G. Férey, Synthesis and catalytic properties of MIL-100 (Fe), an iron (III) carboxylate with large pores, *Chemical Communications* (27) (2007) 2820-2822.
- [2] D.J. Greenblatt, Clinical pharmacokinetics of oxazepam and lorazepam, *Clinical pharmacokinetics* 6(2) (1981) 89-105.
- [3] N. Ghiasi, R.K. Bhansali, R. Marwaha, Lorazepam, StatPearls [Internet] (2020).
- [4] J.G. Rutgers, C.M. Shearer, Lorazepam, *Analytical profiles of drug substances*, Elsevier 1981, pp. 397-426.
- [5] J.E. Gurst, NMR and the structure of D-glucose, *Journal of Chemical Education* 68(12) (1991) 1003.
- [6] J. Wang, M. Dang, C. Duan, W. Zhao, K. Wang, Carboxymethylated cellulose fibers as low-cost and renewable adsorbent materials, *Industrial & Engineering Chemistry Research* 56(51) (2017) 14940-14948.
